# Supplementary material for: Trehalose protects against oxidative stress by regulating the Keap1–Nrf2 and autophagy pathways
Source: PubMed Central journal article supplement (PMC5730428; doi:10.1016/j.redox.2017.09.007), 2017-09-20
Supplement: mmc1.pdf [file mmc1.pdf]

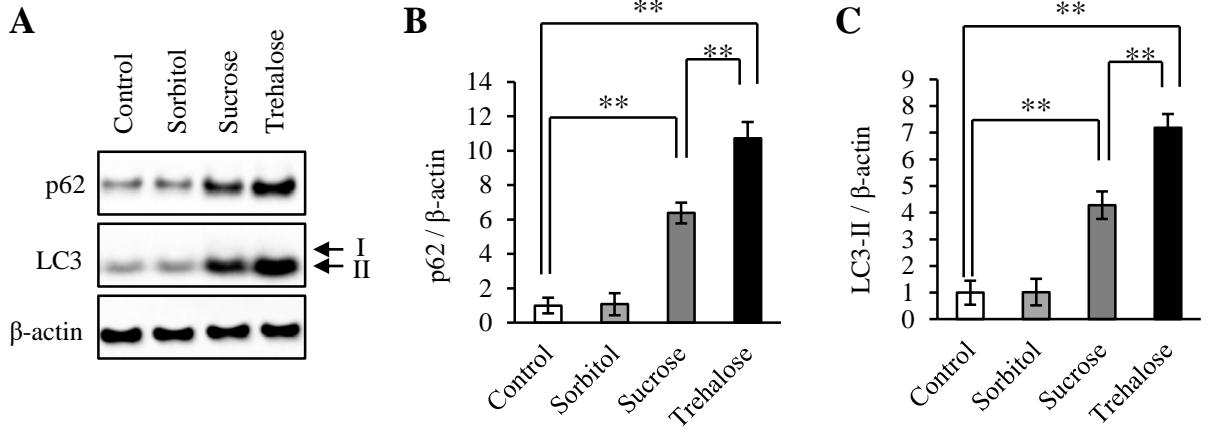

**Supplementary Figure 1**
